# 1 Very few sites can reshape a phylogenetic tree

2 Warren R. Francis<sup>1</sup>, Donald E. Canfield<sup>1</sup>

<sup>1</sup>Department of Biology, Syddansk Universitet, Odense, Denmark

3 *Keywords: porifera, ctenophora, phylogenetics, supermatrix, bias*

## 4 **Abstract**

5 The history of animal evolution, and the relative placement of extant animal phyla in this history  
6 is, in principle, testable from phylogenies derived from molecular sequence data. Though datasets  
7 have increased in size and quality in the past years, the contribution of individual genes (and  
8 ultimately amino acid sites) to the final phylogeny is unequal across genes. Here we demonstrate  
9 that by removing a small fraction of sites that strongly favor one topology, it is possible produce  
10 a highly-supported tree of an alternate topology. We explore this approach using a dataset for  
11 animal phylogeny, and create a highly-supported tree with a monophyletic group of sponges and  
12 ctenophores, a topology not usually recovered. As nearly all gene sets are neither standardized nor  
13 representative of the entire genome, we conclude that there are only two possible ways to remedy  
14 this problem. One solution would need to use a fixed set of genes, which though not representative,  
15 is at least standardized. The other would be to construct phylogenies using all genes, thus limiting  
16 analysis to species with sequenced genomes.

## 17 **Introduction**

18 It has been over a decade since Rokas et al. (2005) noted substantial challenges in reconciling  
19 molecular phylogeny of metazoans, particularly with respect to deep nodes. In an early attempt  
20 to apply molecular sequence data to bilaterian evolutionary relationships, Dunn et al. (2008) had

21 the surprising finding that ctenophores (comb jellies) emerged as the sister-group to the rest of  
22 metazoans (hereafter called Ctenophora-sister), contrary to the classically-held view that sponges  
23 were sister-group to all other animals (the hypothesis called Porifera-sister). A number of papers  
24 followed arguing both for and against each of these topologies (Philippe et al. 2009, Ryan et al.  
25 2013, Whelan et al. 2015, Pisani et al. 2015, Simion et al. 2017, Whelan et al. 2017). Thus, despite  
26 over a decade of work, the deep branches of the animal tree remain unresolved.

27 The choice of genes used in phylogenetic reconstruction may have a substantial effect on the final  
28 tree. Shen et al. (2017) have shown that for most controversial nodes, some genes have very strong  
29 phylogenetic signals while other genes contain essentially none. While Shen et al. (2017) made  
30 some suggestions about how to resolve recalcitrant nodes, their method highlighted a potential risk  
31 of “stacking the deck” and generating a biased tree topology by selecting a set of genes that skew  
32 towards one topology. Here we demonstrate that with the removal of only 1.7% of sites, we can  
33 generate a tree with an alternate topology of metazoan phylogeny. We then discuss the overall lack  
34 of scrutiny on sitewise filtering strategies and suggest that substantial biases can be introduced.

## 35 **Methods**

### 36 **Datasets and processing**

37 We re-analyzed dataset 16 from Whelan et al. (2015), the same dataset used in the re-analysis  
38 by Pisani et al. (2015) and by Shen et al. (2017). This dataset was a filtered version of the main  
39 dataset used by Whelan et al. (2015), wherein genes and taxa with high long-branch scores were  
40 removed, and from that, the slowest-evolving half of the genes were analyzed.

41 Sitewise likelihood calculations were generated using the method of Shen et al. (2017), with  
42 one difference. Briefly, this is a four-branch resolution problem, whereby the method takes three  
43 fixed trees and analyzes the likelihood at each site given the three possibilities (Figure 1). Using  
44 the program RAxML, this is done with the option `-f G`. The likelihood values for each site for  
45 each tree are then directly compared, where the least negative means the most likely. However, in  
46 Shen et al. (2017), the strength of the site for each topology (dlnL) was calculated as the average

47 of the absolute value of the three differences. Such approach would overestimate the strength of  
48 sites where one topology was substantially weaker (i.e. less likely) than the other two. Thus, we  
49 defined the strength of a site as the values of the maximum likelihood topology minus the score of  
50 the second best topology. Here “strong sites” are defined as sites where the absolute difference in  
51 log likelihood is greater or equal to 0.5, the same threshold used by Shen et al. The vast majority  
52 of sites have differences in likelihood values that are close to zero (appx. 98% of sites), thus a dlnL  
53 score of 0.5 represents roughly 3 standard deviations above the mean.

54

55 To generate our experimental dataset (called the “weak” dataset), we started with the site-  
56 wise likelihood scores from Shen et al. (2017) for dataset D16 of Whelan et al. (2015), which were  
57 reformatted to a tabular file using a Python script `sitewise_ll_to_columns.py`. This was then  
58 used as the input for another script `sitewise_get_strong_sites_2tree.py` that calculated strong  
59 sites based on the first two trees, Ctenophora-sister and Porifera-sister, and removed sites with  
60 dlnL greater or equal to 0.5 that favored either of the two topologies, but not those supporting  
61 the third topology, the monophyly of sponges and ctenophores. This procedure removed 414 sites  
62 out of the total 23676 sites, only 1.7% (for comparison, human and zebrafish are 14% different  
63 in this dataset.) These scripts can be found at the Github repository [https://github.com/wrf/  
64 pdbcolor/tree/master/sitewise\\_scripts](https://github.com/wrf/pdbcolor/tree/master/sitewise_scripts).

65

## 66 **Phylogenetics**

67 We generated phylogenetic trees using RAxML v8.2.11 (Stamatakis 2014) using the PROTGAMMALGF  
68 model and 100 bootstrap replicates with the “rapid bootstrap” option (`-f a`). The same dataset  
69 was run in a Bayesian framework with Phylobayes-MPI v1.8 using the CAT-GTR model (Lartillot  
70 et al. 2007). Two chains were run in parallel for approximately 1000 cycles and otherwise default  
71 parameters. Trees and run data can be found at the online repository [https://bitbucket.org/  
72 wrf/paranimalia-sites](https://bitbucket.org/wrf/paranimalia-sites).

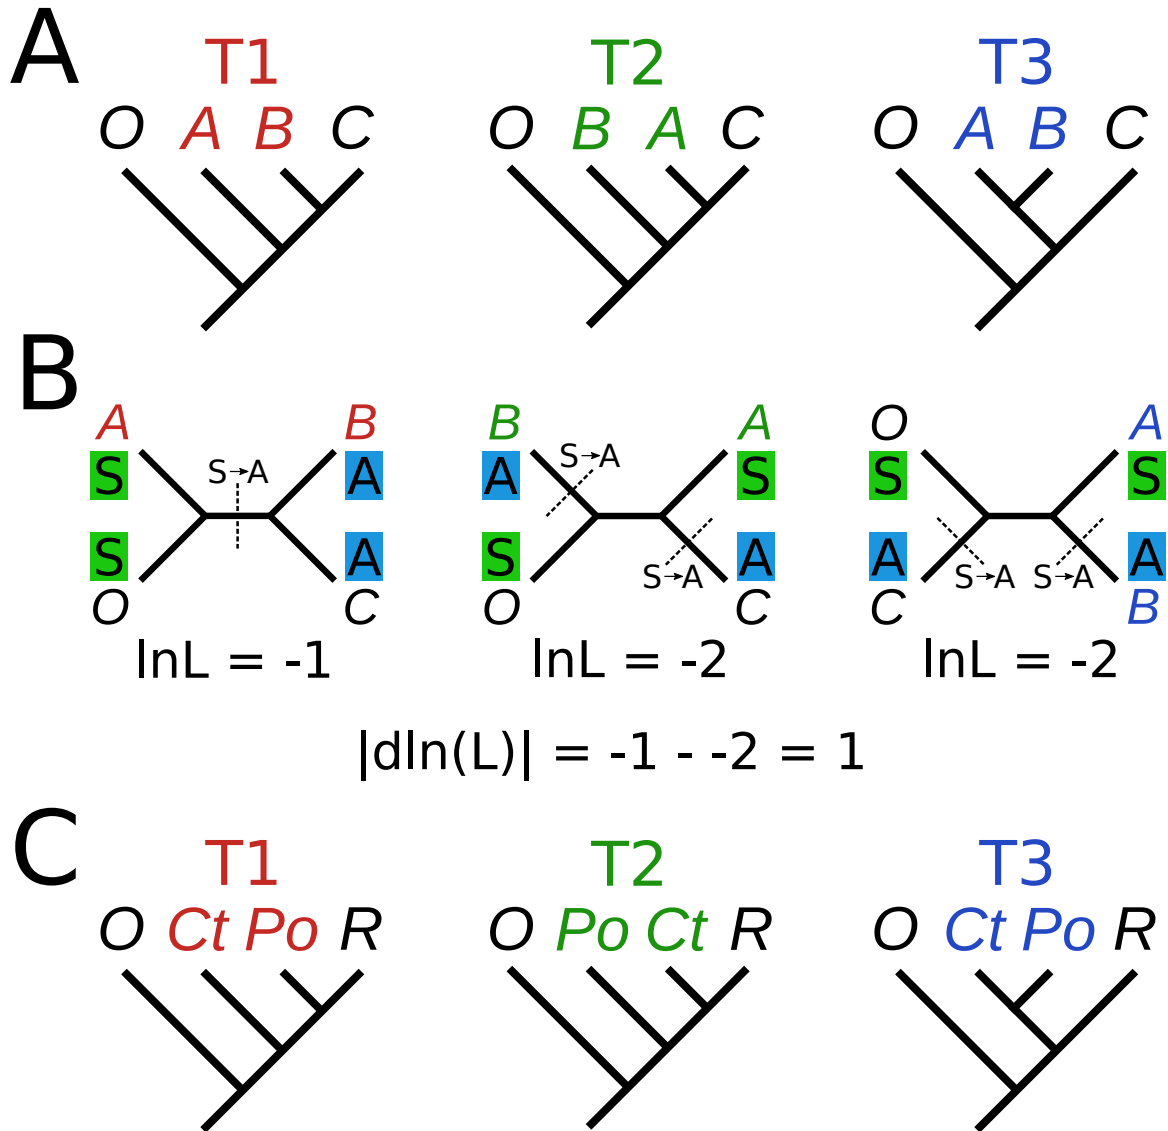

Figure 1: **Schematic of analysis:** (A) Three fixed trees differ by the position of groups A and B, relative to group C and outgroup O. (B) Sites in the alignment either show 1 or 2 substitutions, depending on which tree is used. The substitutions do not have direction in time-reversible models, so the transition applies in either direction across the dotted lines. In this hypothetical example, the  $d\ln(L)$  between the maximum (-1) and median (-2) would be 1, indicating a strong site favoring T1. In this case, while T1 has the maximum likelihood, it is also the most parsimonious. (C) Concretely, in our study, T1 was the Ctenophora-sister hypothesis, T2 was the Porifera-sister hypothesis, and T3 was the paranimalia hypothesis. ‘Ct’ and ‘Po’ indicate ctenophores and sponges, respectively, while ‘O’ indicates non-metazoan outgroups (other opisthokonts) and ‘R’ indicates the rest of animals.

### 73 Comparison across datasets

74 We compared the extent of alignment trimming and sitewise coverage across several phylogenetic  
75 datasets from previously published studies (see Table 1). For calculation of the trimmed fraction for  
76 each protein, we used the length of the alignment relative to the human reference protein. Because  
77 human proteins were not included in the Philippe 2009 or Ryan 2013 EST datasets, the human  
78 orthologs needed to be identified for each gene.

Table 1: Phylogenomic data sources

| Dataset name   | Genes | Taxa | Sites  | Average coverage (by gene) | Average coverage (by site) | Human proteins | Total kept fraction after trimming | Reference              |
|----------------|-------|------|--------|----------------------------|----------------------------|----------------|------------------------------------|------------------------|
| Philippe 2009  | 128   | 55   | 30257  | 82%                        | 73.1%                      | 0 (128)        | 86.0%                              | (Philippe et al. 2009) |
| Ryan 2013 EST  | 406   | 70   | 88384  | 50                         | 41.6                       | 0 (396)        | 62.5                               | (Ryan et al. 2013)     |
| Whelan 2015 D1 | 251   | 76   | 81006  | 75                         | 59.6                       | 248            | 56.6                               | (Whelan et al. 2015)   |
| Borowiec 2015  | 1080  | 36   | 384981 | 87                         | 75.8                       | 1056           | 64.7                               | (Borowiec et al. 2015) |
| Cannon 2016    | 212   | 78   | 44896  | 80                         | 69.0                       | 212            | 46.1                               | (Cannon et al. 2016)   |
| Simion 2017    | 1719  | 97   | 401632 | 74                         | 60.7                       | 1499           | 40.0                               | (Simion et al. 2017)   |

79 We developed a pipeline to identify genes from an existing alignment in additional species, called  
80 `add_taxa_to_align.py`. This pipeline makes use of `hmmbuild` and `hmmsearch` from the HMMER  
81 package v3.1b2 (Eddy 2011) and the alignment program `MAFFT` v7.313 (Katoh et al. 2017). Briefly,  
82 for each gene in a supermatrix, a hidden Markov model is generated using `hmmbuild`, and this is  
83 used as the query for `hmmsearch` to search within a file of proteins from the new species. The  
84 results are filtered by multiple heuristics, and the best sequence is added to the existing alignment  
85 using `MAFFT`, with the `--addlong` option.

86 This script and related instructions are available at the github repository: <https://github.com/wrf/supermatrix>.  
87

## 88 Results

### 89 Paranimalia is recovered regardless of model

90 By removing the "strong" sites from the supermatrix alignment, we then generated two phylogenetic  
91 trees using two programs, RAxML (using the model PROTGAMMALGF) and phylobayes (under the  
92 model CAT-GTR) to assess the impact on the final tree.

93 As expected, both trees strongly supported monophyly of ctenophores and sponges, (boot-  
94 strap:94; PP:1.0; Figure 2), hereafter called "paranimalia". This confirms that the sites removed  
95 contained the majority of phylogenetic information in support of Ctenophora-sister or Porifera-  
96 sister. Although the matrix contained distant outgroups (fungi, as well as choanoflagellates)  
97 (Philippe et al. 2009, Pisani et al. 2015), Ctenophora-sister was not recovered in either tree, indi-  
98 cating that either any long-branch attraction artifacts are weaker than the intrinsic signal in the  
99 sites, or the sites that support Ctenophora-sister are those subject to the proposed "long branch  
100 attraction".

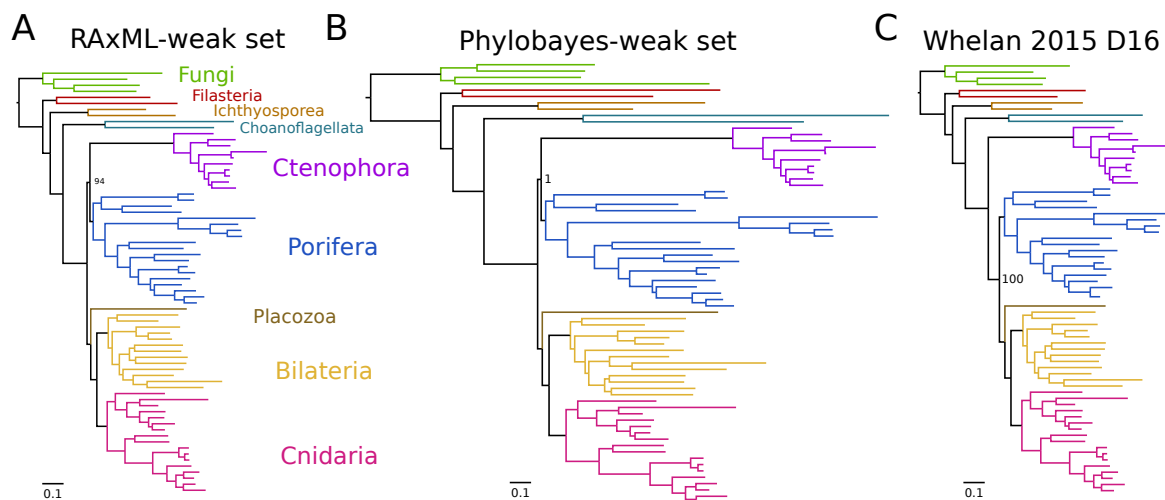

Figure 2: **Overview of phylogenetic trees:** (A) Tree from RAxML (B) Tree from Phylobayes with CAT-GTR. Note the scale bars are the same but the phylobayes tree is substantially longer, likely due to increased substitutions predicted from the CAT model. (C) Original tree from Whelan et al. (2015) dataset 16, showing that, other than ctenophores and sponges, nearly all bipartitions are exactly the same before and after our processing. Most support values are removed for clarity.

## 101 **Few topological differences are found**

102 The internal topology of nearly all phyla remains the same (Figures 3 and 4), despite changing  
103 the position of the nodes for ctenophora and porifera, suggesting that sites providing informa-  
104 tion for each bipartition are mostly independent. One obvious inconsistency is the placement of  
105 Ichthyosporea and Filasterea relative to dataset 10 by Whelan et al. (2015), as these two groups  
106 are swapped (see both Figures 3 and 4).

107 For both analyses, Ambulacraria was recovered as sister to Bilaterians (71 bootstrap, PP 0.85),  
108 indicating paraphyletic deuterostomes. This topology was also recovered by Whelan et al. (2015)  
109 with their dataset 16, but not with dataset 10, which was used for the main figure (Figure 3 in  
110 Whelan et al. (2015)). This position of Ambulacraria was also found by Simion et al. (2017) af-  
111 ter substantial trimming of the dataset, whereupon 70% of “heteropecillious” sites were removed  
112 (Roure and Philippe 2011). Cannon et al. (2016) found this tree position occupied by the Xena-  
113 coelomorpha; this group includes the genus *Xenoturbella*, which was often recovered as sister to  
114 Ambulacraria within Deuterostomes (Philippe et al. 2009; 2011). The recovery of Ambulacraria as  
115 sister to Bilaterians may indicate a relationship between heteropecilly (lineage-specific transitions  
116 or substitution matrices) and strong sites in a maximum likelihood framework. In other words,  
117 lineage-specific changes in proteins may be a major source of phylogenetic information.

118 Other small differences are evident (Figures 3 and 4), such as the placement of the ctenophore  
119 *Beroe abyssicola* relative to *Mnemiopsis leidyi* (PP:1). Another is the placement of *Priapulus*  
120 *caudatus* as sister to protostomes, instead of just arthropods (PP:0.52).

## 121 **Most datasets are heavily trimmed**

122 In our weak dataset, only 1.7% of sites had been removed, albeit the original dataset had already  
123 been trimmed in the D16 by an average of 30% per protein, compared to the reference proteins.  
124 While such trimming strategies make sense for highly repetitive regions that cannot be aligned, one  
125 study found that nearly all programs will overtrim, resulting in an overall less-supported phylogeny  
126 than if nothing were done at all (Tan et al. 2015). Even across these six studies in Figure 5 that we

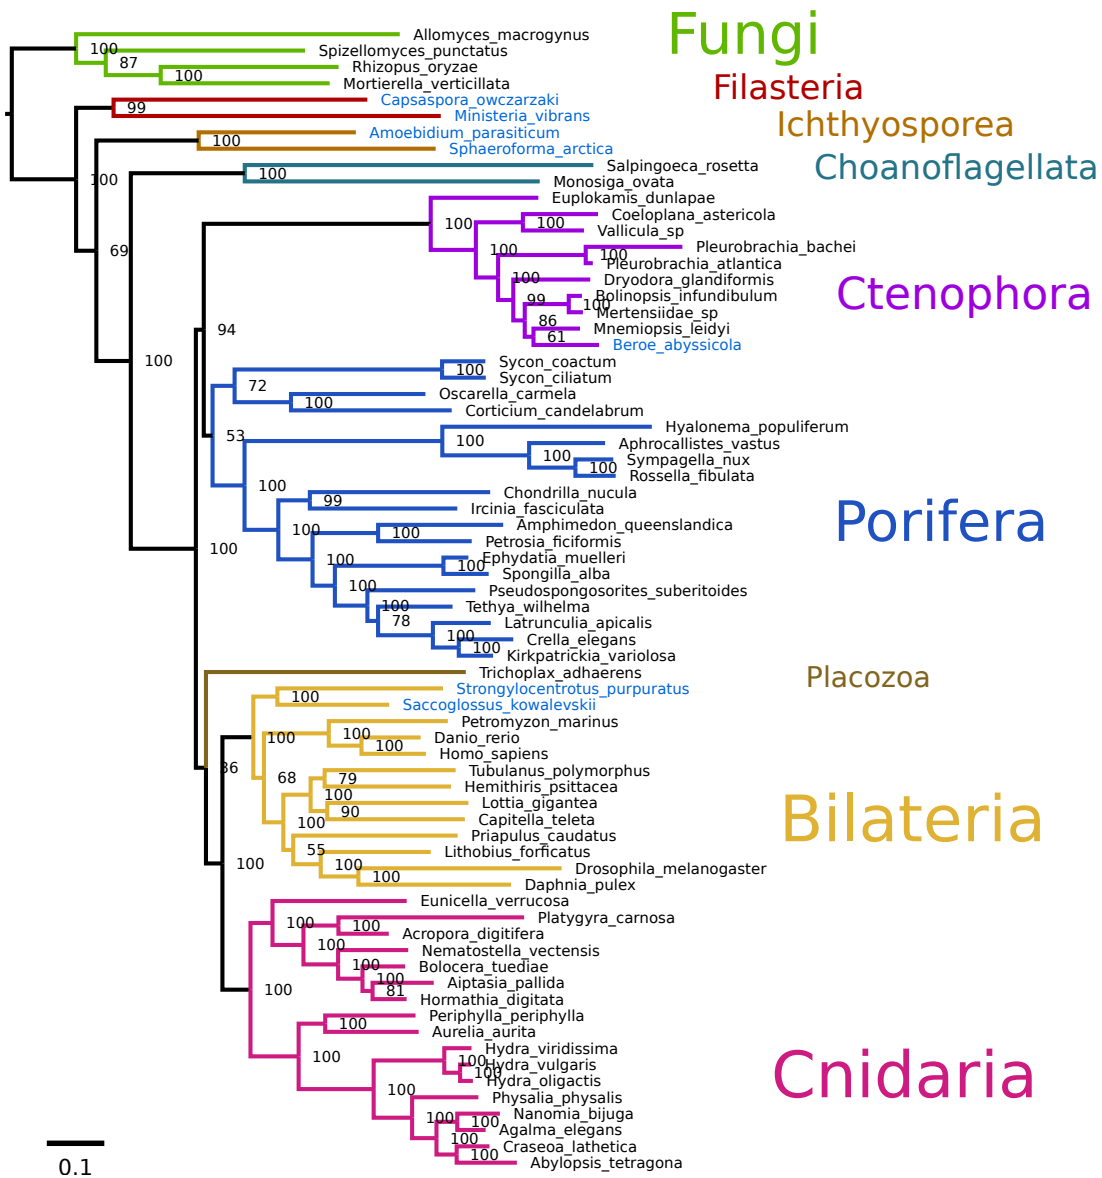

Figure 3: **RAxML tree:** Tree of the weak dataset from RAxML using the PROTGAMMALGF model. Taxa highlighted in red are moved relative to the original dataset 16 by Whelan et al. (2015). Taxa highlighted in blue are moved relative to dataset 10 from the same study.

127 investigated, none of them include an unfiltered version for analysis, so the effect of these removed  
 128 sites or domains is unknown.

129



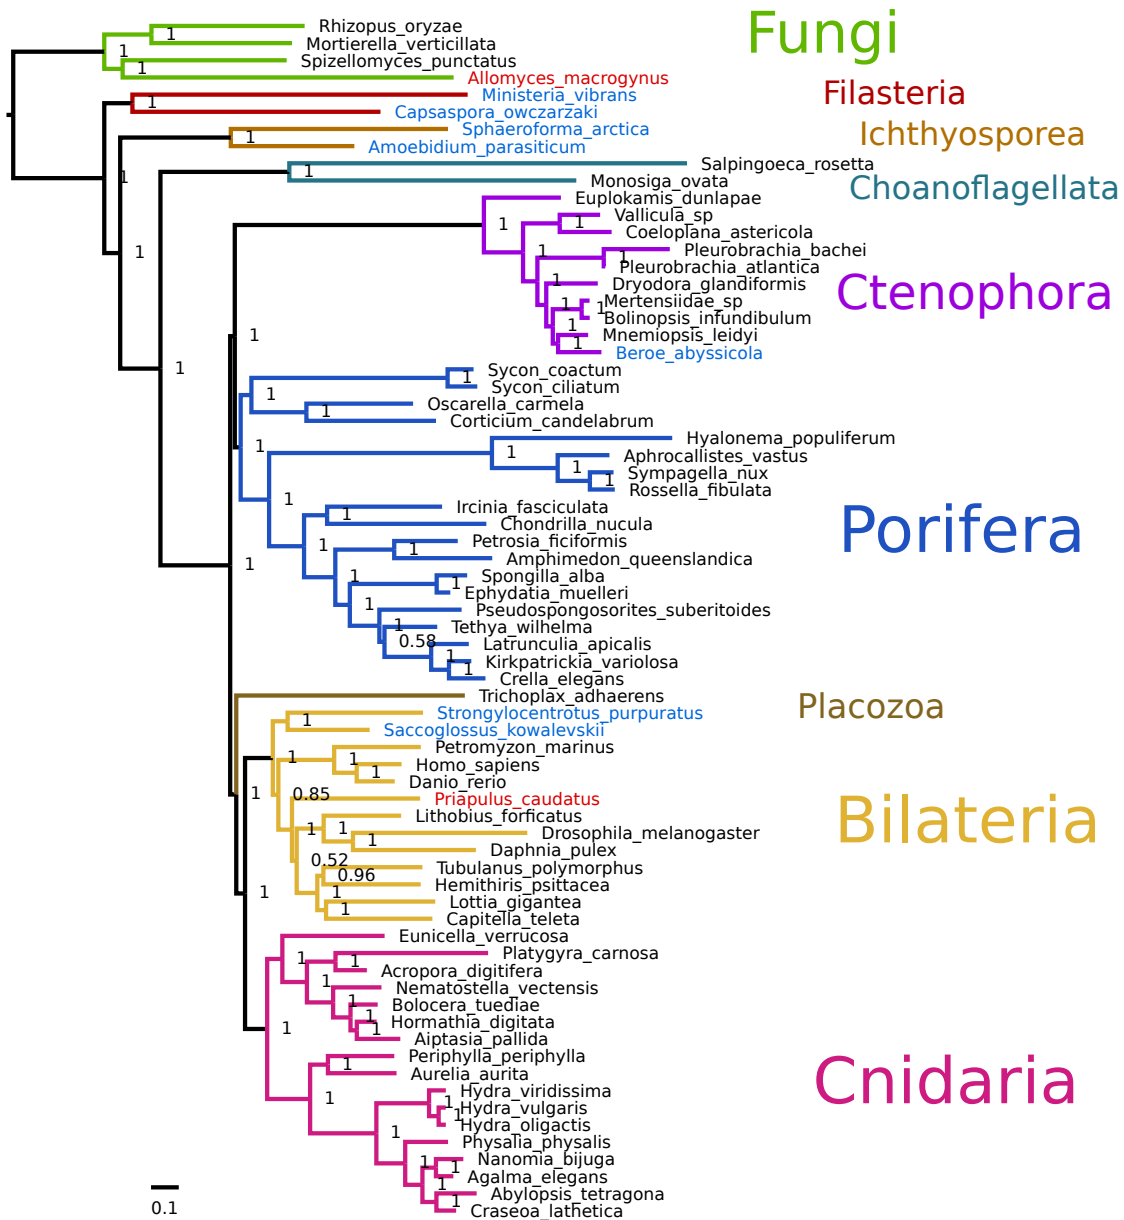

Figure 4: **Phylobayes tree:** Tree of the weak dataset from phylobayes using the CAT-GTR model. Taxa highlighted in red are moved relative to the original dataset 16 by Whelan et al. (2015). Taxa highlighted in blue are moved relative to dataset 10 from the same study.

130 As there is typically no examination of which sites are filtered, it is easy to imagine the inci-  
 131 dental removal of sites favoring a particular hypothesis, as we had specifically done in this study.  
 132 The most trimmed study, (Simion et al. 2017) had removed over half of the amino acids of each

133 protein on average compared to the reference proteins, from almost 1 million amino acids of total  
 134 native proteins to an alignment of just over 400k amino acids (Table 1). As sites affecting deep  
 135 nodes may account for only a fraction of 1% of all sites, exclusion of 60% of the original sites may  
 136 affect deep nodes but not shallow nodes.

137

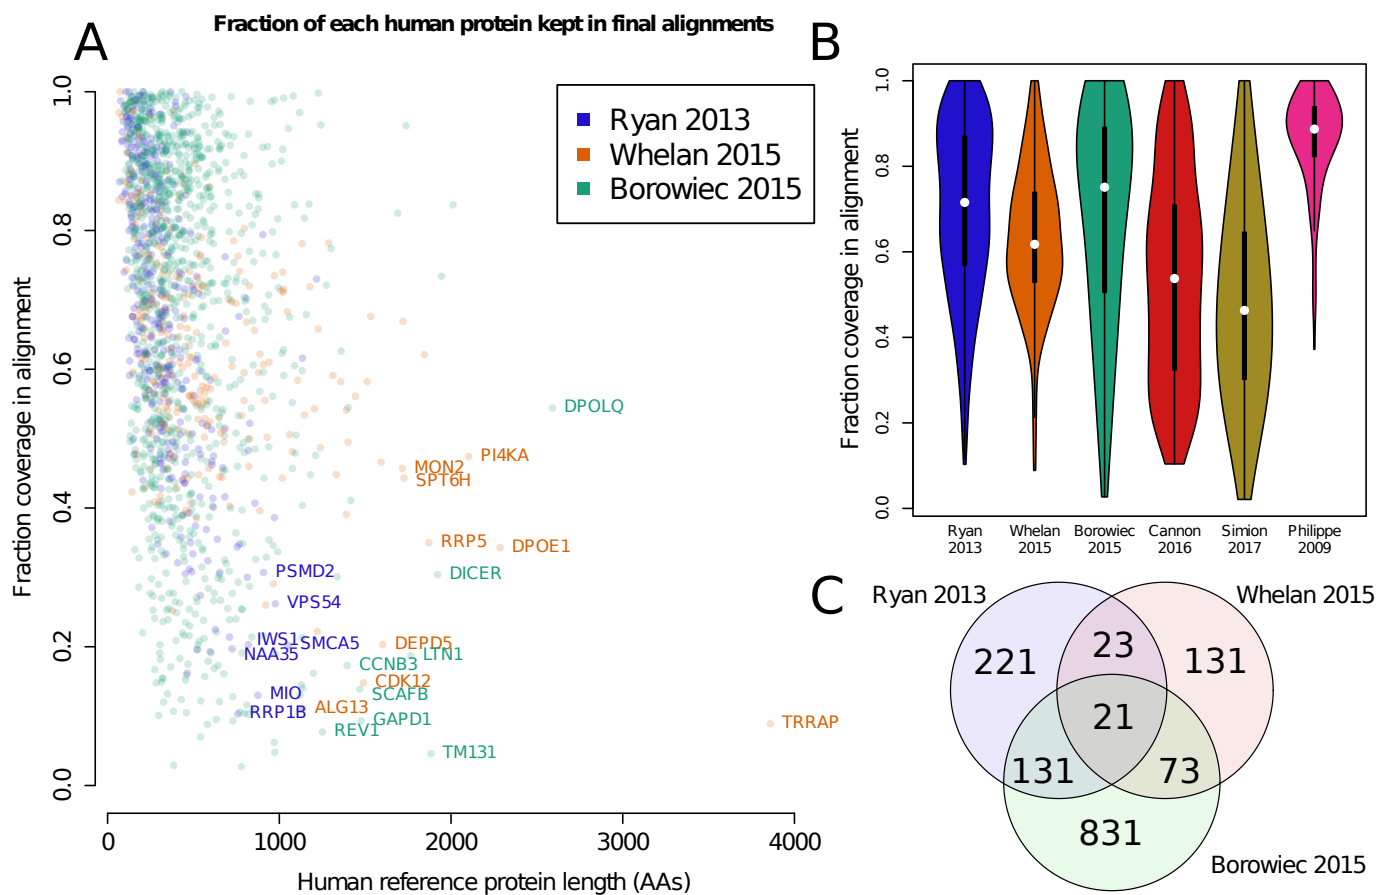

Figure 5: **Fraction of the original protein in the final alignment:** (A) Fraction of the original human protein that was used in the final alignment, meaning after any trimming steps, for the three metazoan datasets used by Shen et al. (2017), that is, the datasets from Ryan et al. (2013), Whelan et al. (2015), and Borowiec et al. (2015). Certain large and highly-trimmed protein names (UniProt IDs) are indicated. (B) Violin plots showing the distribution of the kept fractions of the original proteins across the six datasets. Width is proportional to the normalized number of proteins with the coverage on the Y-axis. Simion 2017 was the least retained after trimming (average of 48%) while Philippe 2009 was the most (average of 86%). (C) Venn diagram of the proteins used in each study, out of 1431 total proteins across all three studies.

## 138 **Discussion**

### 139 **Utility of sitewise filtering**

140 Shen et al. (2017) had analysed the contributions of individual sites against trees with a fixed  
141 topology to discern which sites favor each tree. While this work did not resolve many of the con-  
142 troversial phylogenies, including that of animals, it did emphasize the importance of gene selection.  
143 Such a method is highly sensitive to taxon sampling, and likelihood scores can be calculated even  
144 in cases where it appears to be inappropriate, or makes little biological sense. For instance, in  
145 the Borowiec et al. (2015) dataset, there was only one ctenophore and one sponge, yet strong sites  
146 favoring Ctenophora-sister or Porifera-sister were still calculated even when the gene was absent  
147 for one or both of the two species. Potentially, genes where the ctenophore or sponge were absent  
148 should have been excluded. Therefore, in order for the results to be meaningful, essentially all  
149 sites should be occupied for all relevant taxa, in this case meaning all ctenophores, sponges, and  
150 outgroups.

### 151 **Other examination of bias in datasets**

152 The work by Feuda et al. (2017) had attempted to examine the effects of strong sites as a function of  
153 substitution model. However, the “outlier-excluded” dataset used in their re-analysis was produced  
154 by removing outliers without considering the topology they favored and this site-selection method-  
155 ology actually resulted in a dataset depleted in Ctenophora-sister favoring sites (all of the seven  
156 outliers favored Ctenophora-sister). A tree supporting Porifera-sister should therefore be expected  
157 from the analysis of this dataset as genes strongly supporting Ctenophora-sister were removed, but  
158 not those favoring Porifera-sister or any other systematic bias. Our results indicated that removal  
159 of sites favoring a specific topology (in our case, both Ctenophora-sister and Porifera-sister) can  
160 produce a highly supported tree favoring another topology for which sites were not removed (i.e.  
161 paranimalia).

162

## 163 **Resolution of metazoan phylogeny**

164 Relationships among non-bilaterian animals historically placed sponges as sister-group to remaining  
165 animals, which agreed with a scheme of “complexity” coming from the Aristotelian chain-of-being;  
166 sponges are simple animals, and therefore should be placed at the root of the animal tree. Although  
167 by this logic, the morphologically simplest animals, placozoans, should therefore be the sister-group  
168 to all other animals. Ctenophores, on the other hand, have historically been placed in a group with  
169 cnidarians, called “coelenterata” or “radiata”, though detailed morphological analyses argued that  
170 every proposed synapomorphy of “coelenterata” was either uninformative or incorrect (Harbison  
171 1985), indicating they were falsely united. The “paranimalia” hypothesis was only generated here  
172 as an example, but these two phyla (Porifera and Ctenophora) are united by some qualities, such  
173 as the absence of the HIF oxygen sensing pathway (Mills et al. 2018).

174

175 Animal molecular phylogeny remains controversial and technically challenging because differ-  
176 ences in gene set (Nosenko et al. 2013), substitution model (Feuda et al. 2017), and missing data  
177 (Roure et al. 2013) have profound effects on the final tree. Other technical factors like introduction  
178 of newer versions of software make it practically infeasible to compare between datasets and results.  
179 In practice, this might require downloading or re-assembling the source data, finding orthologous  
180 genes across all species, filtering paralogs or incomplete transcripts, aligning, trimming, and finally  
181 generating the tree.

182

183 There is the additional semantic problem of how the results are described. There are al-  
184 most an infinite number of possible hypotheses of metazoan phylogeny; most of these are unlikely,  
185 thus we may concern ourselves with a limited set of competing hypotheses of animal phylogeny,  
186 Ctenophora-sister and Porifera-sister. It is common to say there is “robust” support for a hypothe-  
187 sis in phylogenetics based purely on the bootstrap or posterior probability, but these two values do  
188 not reflect the fraction of sites favoring the two hypotheses of interest. Even considering the results  
189 of Shen et al. (2017) at face value, the only datasets that have reasonable coverage of ctenophores

190 and sponges (meaning the sitewise likelihood is based on more than 1 taxon per phylum) are the  
191 Whelan et al. (2015) datasets. Of these, barely above 50% of all sites (both strong and weak  
192 sites) favor Ctenophora-sister. Shen et al. (2017) argued this was still sufficient support for the  
193 Ctenophora-sister hypothesis. However, this was without consideration of inherent noise in the  
194 data. For instance, sitewise likelihood values are calculated for all sites, including constant sites,  
195 and including sites with no ctenophores or no sponges. As weak sites are essentially phylogenetic  
196 noise, it would be more accurate to say this hypothesis is *slightly* or *marginally* favored, while 98%  
197 of sites do not affect this part of the tree.

198

199 Our results indicate that removal of a small fraction of sites (under 2%) can dramatically change  
200 the tree, and ultimately the hypotheses of animal evolution, yet many studies trim at least 40%  
201 of sites from the reference proteins (Figure 5). Thus, the resolution of the deep nodes of the tree,  
202 regardless of method or model, is extremely poor, and the statistical strategies to validate the  
203 approach (bootstrapping or posterior probability) do not reflect the true uncertainty of the data.  
204 Given the tenuous support for any of the topologies of animal phylogeny, it seems reasonable to  
205 say that we simply lack the information to resolve this, and should, at this time, defer on the null  
206 hypothesis that this node is still unresolved.

207

## 208 **What would make an unbiased set?**

209 There are only two possibilities to have an unbiased set, whether deliberately or algorithmically.  
210 One would be a finite set of select genes that most or all species have and everyone agrees to  
211 use, such as mitochondrial proteins or ribosomal proteins. These may not be representative of the  
212 entire genome (potentially a bias in itself) but could at least be standardized. The other option  
213 would be to include all proteins, including those with multiple copies. Because of the difficulty in  
214 resolving species trees from multi-copy gene trees, algorithmic improvements may also be necessary.  
215 This may require that all species used in phylogenetic reconstructions have sequenced genomes to  
216 ensure that all genes are sampled, as bona fide gene losses cannot be identified with transcriptomes.

217

## 218 Acknowledgements

219 WRF would like to thank SHD. Haddock, S. Vargas and M. Eitel for helpful comments. This work  
220 was supported by the Villum Foundation grant 16518 to DEC.

## 221 References

### 222 References

- 223 Borowiec, M. L., Lee, E. K., Chiu, J. C., and Plachetzki, D. C. (2015). Extracting phylogenetic  
224 signal and accounting for bias in whole-genome data sets supports the Ctenophora as sister to  
225 remaining Metazoa. *BMC Genomics*, 16(1):987.
- 226 Cannon, J. T., Vellutini, B. C., Smith, J., Ronquist, F., Jondelius, U., and Hejnol, A. (2016).  
227 Xenacoelomorpha is the sister group to Nephrozoa. *Nature*, 530(7588):89–93.
- 228 Dunn, C. W., Hejnol, A., Matus, D. Q., Pang, K., Browne, W. E., Smith, S. a., Seaver, E.,  
229 Rouse, G. W., Obst, M., Edgecombe, G. D., Sørensen, M. V., Haddock, S. H. D., Schmidt-  
230 Rhaesa, A., Okusu, A., Kristensen, R. M., Wheeler, W. C., Martindale, M. Q., and Giribet,  
231 G. (2008). Broad phylogenomic sampling improves resolution of the animal tree of life. *Nature*,  
232 452(7188):745–9.
- 233 Eddy, S. R. (2011). Accelerated profile HMM searches. *PLoS Computational Biology*, 7(10).
- 234 Feuda, R., Dohrmann, M., Pett, W., Philippe, H., Rota-Stabelli, O., Lartillot, N., Wörheide, G.,  
235 and Pisani, D. (2017). Improved Modeling of Compositional Heterogeneity Supports Sponges  
236 as Sister to All Other Animals. *Current Biology*, pages 1–7.
- 237 Harbison, G. R. (1985). On the classification and evolution of the Ctenophora. In Conway Morris,  
238 S. C., George, J. D., Gibson, R., and Platt, H. M., editors, *The Origin and Relationships of*  
239 *Lower Invertebrates*, pages 78–100. Clarendon Press, Oxford.
- 240 Katoh, K., Rozewicki, J., and Yamada, K. D. (2017). MAFFT online service: multiple se-  
241 quence alignment, interactive sequence choice and visualization. *Briefings in Bioinformatics*,  
242 1(November):1–7.
- 243 Lartillot, N., Brinkmann, H., and Philippe, H. (2007). Suppression of long-branch attraction  
244 artefacts in the animal phylogeny using a site-heterogeneous model. *BMC Evolutionary Biology*,  
245 7(Suppl 1):S4.
- 246 Mills, D. B., Francis, W. R., Vargas, S., Larsen, M., Elemans, C. P., Canfield, D. E., and  
247 Wörheide, G. (2018). The last common ancestor of animals lacked the HIF pathway and  
248 respired in low-oxygen environments. *eLife*, 7:1–17.

- 249 Nosenko, T., Schreiber, F., Adamska, M., Adamski, M., Eitel, M., Hammel, J., Maldonado, M.,  
250 Müller, W. E. G., Nickel, M., Schierwater, B., Vacelet, J., Wiens, M., and Wörheide, G. (2013).  
251 Deep metazoan phylogeny: when different genes tell different stories. *Molecular phylogenetics*  
252 *and evolution*, 67(1):223–33.
- 253 Philippe, H., Brinkmann, H., Copley, R. R., Moroz, L. L., Nakano, H., Poustka, A. J., Wallberg,  
254 A., Peterson, K. J., and Telford, M. J. (2011). Acoelomorph flatworms are deuterostomes  
255 related to Xenoturbella. *Nature*, 470(7333):255–260.
- 256 Philippe, H., Derelle, R., Lopez, P., Pick, K., Borchiellini, C., Boury-Esnault, N., Vacelet, J.,  
257 Renard, E., Houliston, E., Quéinnec, E., Da Silva, C., Wincker, P., Le Guyader, H., Leys, S.,  
258 Jackson, D. J., Schreiber, F., Erpenbeck, D., Morgenstern, B., Wörheide, G., and Manuel, M.  
259 (2009). Phylogenomics revives traditional views on deep animal relationships. *Current biology*  
260 *: CB*, 19(8):706–12.
- 261 Pisani, D., Pett, W., Dohrmann, M., Feuda, R., Rota-Stabelli, O., Philippe, H., Lartillot, N.,  
262 and Wörheide, G. (2015). Genomic data do not support comb jellies as the sister group to all  
263 other animals. *Proceedings of the National Academy of Sciences*, 112(50):201518127.
- 264 Rokas, A., Krüger, D., and Carroll, S. B. (2005). Animal evolution and the molecular signature  
265 of radiations compressed in time. *Science (New York, N.Y.)*, 310(5756):1933–8.
- 266 Roure, B., Baurain, D., and Philippe, H. (2013). Impact of missing data on phylogenies inferred  
267 from empirical phylogenomic data sets. *Molecular Biology and Evolution*, 30(1):197–214.
- 268 Roure, B. and Philippe, H. (2011). Site-specific time heterogeneity of the substitution process  
269 and its impact on phylogenetic inference. *BMC Evolutionary Biology*, 11:17.
- 270 Ryan, J. F., Pang, K., Schnitzler, C. E., a. D. Nguyen, A.-d., Moreland, R. T., Simmons,  
271 D. K., Koch, B. J., Francis, W. R., Havlak, P., Smith, S. a., Putnam, N. H., Haddock, S.  
272 H. D., Dunn, C. W., Wolfsberg, T. G., Mullikin, J. C., Martindale, M. Q., Baxevanis, A. D.,  
273 Comparative, N., and Program, S. (2013). The Genome of the Ctenophore *Mnemiopsis leidyi*  
274 and Its Implications for Cell Type Evolution. *Science*, 342(6164):1242592–1242592.
- 275 Shen, X.-x., Hittinger, C. T., and Rokas, A. (2017). Contentious relationships in phylogenomic  
276 studies can be driven by a handful of genes. *Nature Ecology & Evolution*, 1(April):0126.
- 277 Simion, P., Philippe, H., Baurain, D., Jager, M., Richter, D. J., Di Franco, A., Roure, B., Satoh,  
278 N., Quéinnec, É., Ereskovsky, A., Lapébie, P., Corre, E., Delsuc, F., King, N., Wörheide, G.,  
279 and Manuel, M. (2017). A Large and Consistent Phylogenomic Dataset Supports Sponges as  
280 the Sister Group to All Other Animals. *Current Biology*, 27(7):958–967.
- 281 Stamatakis, A. (2014). RAxML version 8: a tool for phylogenetic analysis and post-analysis of  
282 large phylogenies. *Bioinformatics*, 30(9):1312–1313.
- 283 Tan, G., Muffato, M., Ledergerber, C., Herrero, J., Goldman, N., Gil, M., and Dessimoz, C.  
284 (2015). Current methods for automated filtering of multiple sequence alignments frequently  
285 worsen single-gene phylogenetic inference. *Systematic Biology*, 64(5):778–791.

- 286 Whelan, N. V., Kocot, K. M., Moroz, L. L., and Halanych, K. M. (2015). Error , signal , and  
287 the placement of Ctenophora sister to all other animals. *Proceedings of the National Academy*  
288 *of Sciences*, 112(18):1–6.
- 289 Whelan, N. V., Kocot, K. M., Moroz, T. P., Mukherjee, K., Williams, P., Paulay, G., Moroz,  
290 L. L., and Halanych, K. M. (2017). Ctenophore relationships and their placement as the sister  
291 group to all other animals. *Nature Ecology & Evolution*, 1(11):1737–1746.
